# Supplementary material for: Low Interleukin-7 Receptor Messenger RNA Expression Is Independently Associated With Day 28 Mortality in Septic Shock Patients*
Source: PubMed Central journal article supplement — Crit Care Med. 2018 Oct 12;46(11):1739–46. doi: 10.1097/CCM.0000000000003281 (PMC6200380; doi:10.1097/ccm.0000000000003281), 2018-10-12
Supplement: ccm-46-1739-s001.pdf [file ccm-46-1739-s001.pdf]

# Supplemental Digital Content

## Low IL-7 receptor mRNA expression is independently associated with day 28 mortality in septic shock patients

Benjamin Delwarde, Estelle Peronnet, Fabienne Venet, Elisabeth Cerrato, Boris Meunier, Julie Mouillaux, Alain Lepape, Alexandre Pachot, Thomas Rimmelé, Guillaume Monneret, Julien Textoris, on behalf of the MIP Réa study group

### Index

|                                                                                                                                                                    |     |
|--------------------------------------------------------------------------------------------------------------------------------------------------------------------|-----|
| <b>Supplemental Patients Description</b> Discovery and validation cohorts description.....                                                                         | p2  |
| <b>Supplemental Figure 1</b> IL7R transcripts detected by the different PCR designs.....                                                                           | p3  |
| <b>Supplemental Table1</b> PCR assays characteristics.....                                                                                                         | p4  |
| <b>Supplemental Method</b> IL7R transcripts expression level measurement.....                                                                                      | p5  |
| <b>Supplemental Table 2</b> Association between IL7R transcripts expression levels and outcome at day 28 after septic shock diagnosis in the discovery cohort..... | p6  |
| <b>Supplemental Table 3</b> Area under ROC curve and performances for day 28 mortality after septic shock diagnosis in the discovery cohort.....                   | p7  |
| <b>Supplemental Figure 2</b> Validation cohort flowchart.....                                                                                                      | p8  |
| <b>Supplemental Table 4</b> Biological parameters of patients from the validation cohort according to survival status at day 28 after septic shock diagnosis.....  | p9  |
| <b>References</b> .....                                                                                                                                            | p10 |

### **Supplemental Patients Description** Discovery and validation cohorts description

*Discovery cohort:* we included patients from a cohort of adult septic shock patients enrolled from December 2001 to April 2005 in two ICUs from a French university hospital (1). This study is part of a global study on ICU-induced immune dysfunctions and was approved by the local ethics committee (Comité de Protection des Personnes Sud-Est II #IRB 11236). No informed consent was needed, as this study was non-interventional and complementary blood samples were obtained during patients' routine blood sampling after completion of routine follow-up tests. Nevertheless, non-opposition to inclusion in the protocol was recorded from every patient or the patient's next of kin. This study is also registered at the French Ministry of Research and Education (#DC-2008-509). We selected patients with available samples at D1 and D3 to study the variation in IL7R expression levels between these two time-points.

*Validation cohort:* we included septic shock patients from a cohort of adult ICU patients enrolled from December 2009 to June 2011 in six ICUs from three French university hospitals (2). The study protocol was approved by the local ethics committee (Comité d'Ethique des Centres d'Investigation Clinique de l'Inter-Région Rhône-Alpes Auvergne #IRB 5044). No informed consent was needed, as this study was non-interventional and complementary blood samples were obtained during patients' routine blood sampling after completion of routine follow-up tests. Nevertheless, non-opposition to inclusion in the protocol was recorded from every patient or the patient's next of kin. We included septic shock patients with available peripheral whole blood sample at D3, in order to confirm the results obtained on the discovery cohort.

The Simplified Acute Physiology Score (SAPS) II was recorded at ICU admission (3) and the Sequential Organ Failure Assessment (SOFA) score in the first 24 hours after admission (D1) and at day 3 (D3) (4). The chronic health status was defined using the Charlson comorbidity score (5). Length of stay and survival were measured at ICU discharge, at D28 after admission and at hospital discharge

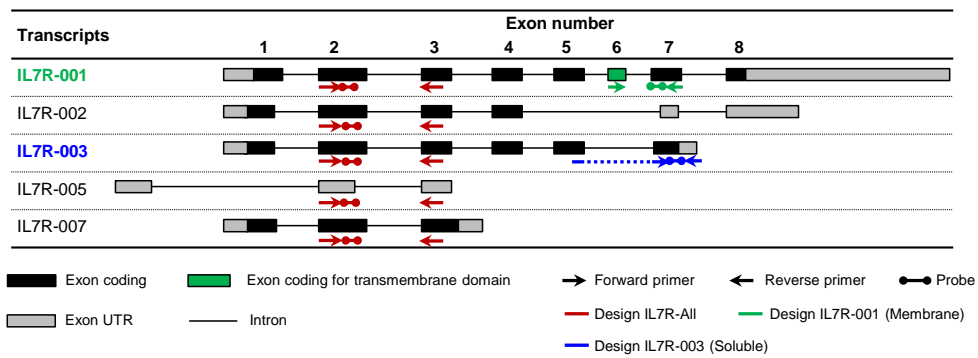

**Supplemental Figure 1** IL7R transcripts detected by the different PCR designs. IL7R transcripts structure is schematically represented from data available in Ensembl database (release 87 - GRCh38.p7). Exons targeted by primers ( $\rightarrow$  or  $\leftarrow$ ) and probes ( $\bullet\text{---}\bullet$ ) of each PCR design are indicated: IL7R-001, encoding the CD127 membrane form, IL7R-003, encoding a CD127 soluble form, and IL7R-All, specific for all studied transcripts, including the two previous ones.

**Supplemental Table1** PCR assays characteristics

| PCR design      | Primers and probes sequences |                           | Target exon                | Detected transcripts       | Product length (bp) |
|-----------------|------------------------------|---------------------------|----------------------------|----------------------------|---------------------|
| <b>IL7R-All</b> | Forward                      | GGAAGTGAATGGATCGCAGC      | 2                          | IL7R-001 (NM_002185)       | 110                 |
|                 | Backward                     | GGCACTTTACCTCCACGAG       | 3                          | IL7R-002 (ENST00000514217) |                     |
|                 | Probe                        | CTGTGCTTTTGAGGACCCAGAT    | 2                          | IL7R-003 (ENST00000506850) |                     |
|                 |                              |                           | 2                          | IL7R-005 (ENST00000511031) |                     |
|                 |                              |                           | IL7R-007 (ENST00000511982) |                            |                     |
| <b>IL7R-001</b> | Forward                      | CTCTGTCGCTCTGTTGGTC       | 6                          | IL7R-001 (NM_002185)       | 99                  |
|                 | Backward                     | TCCAGAGTCTTCTTATGATCG     | 7                          |                            |                     |
|                 | Probe                        | CTATCGTATGCCCCAGTCTCC     | 7                          |                            |                     |
| <b>IL7R-003</b> | Forward                      | GCTCAGGATTAAGCCTATCG      | 5-7                        | IL7R-003 (ENST00000506850) | 131                 |
|                 | Backward                     | CACTGGGATGTTGCCAACAC      | 7                          |                            |                     |
|                 | Probe                        | ATCATAAGAAGACTCTGGAACATCT | 7                          |                            |                     |
| <b>HPRT1</b>    | Forward                      | CAAAGATGGTCAAGGTCGC       | 6                          | HPRT1-001 (NM_000194)      | 159                 |
|                 | Backward                     | GACACAAACATGATTCAAATCC    | 7-8                        |                            |                     |
|                 | Probe                        | CAAGTTTGTGTAGGATATGCC     | 7                          |                            |                     |

### **Supplemental Method** IL7R transcripts expression level measurement

Peripheral whole blood was collected in PAXgene™ tubes (PreAnalytix, Hilden, Germany). Total RNA was extracted using PAXgene™ Blood RNA Kit (PreAnalytix). Before RNA elution, the residual genomic DNA was digested using the Rnase-Free Dnase set (Qiagen, Hilden, Germany). RNA integrity was assessed with the RNA 6000 Nano Kit on a Bioanalyzer (Agilent Technologies, Santa Clara, California, USA). Total RNA was reverse transcribed into complementary cDNA using SuperScript® VILO™ cDNA Synthesis Kit (Life Technologies, Chicago, Illinois, USA).

Three specific PCR assays were designed (See **Supplemental Table 1** for oligonucleotides sequences). **Supplemental Figure 1** shows which IL7R exons are hybridized by the different primers and probes. The “IL7R-001” PCR is specific of the IL7R-001 transcript. This transcript, which contains the exon 6 corresponding to the transmembrane domain, encodes the full-length membrane form of CD127. The “IL7R-003” PCR is specific of the IL7R-003 transcript, encoding a CD127 soluble form. The “IL7R-All” PCR quantifies all IL7R transcripts studied, including the two previously described.

PCR reactions were performed on a LightCycler 480 instrument (Roche, Bale, Switzerland), using a LightCycler 480 Probes Master kit (Roche) following manufacturer’s instructions. Thermocycling was carried out in a final volume of 20 µL containing 0.5 µM of primers and 0.1 µM of probe, with an initial denaturation step of 10 min at 95°C, followed by 45 cycles of a touchdown PCR protocol (10 sec at 95°C, 29 sec annealing at 68-58°C, and 1 sec extension at 72°C). The Second Derivative Maximum Method was used with the LightCycler software to automatically determine the crossing point for individual samples. Standard curves were generated by using four replicates of cDNA standards and were used to perform efficiency corrected quantification. For comparison between expression levels of the different IL7R transcripts, absolute concentrations (copies/µL) were used. For analysis of association with the outcome, gene expression was normalized using HPRT1 (hypoxanthine phosphoribosyltransferase 1) as reference gene and results were expressed as Calibrated Normalized Relative Quantity (6).

**Supplemental Table 2** Association between IL7R transcripts expression levels and outcome at day 28 after septic shock diagnosis in the discovery cohort

| IL7R transcripts                | Time-point  | IQR HR (95% CI)  | p-value      |
|---------------------------------|-------------|------------------|--------------|
| IL7R-All                        | D1          | 0.71 (0.32-1.60) | 0.407        |
|                                 | D3          | 0.12 (0.02-0.81) | <b>0.029</b> |
|                                 | D3/D1 ratio | 0.14 (0.02-1.09) | 0.06         |
| IL7R-001<br>( <i>Membrane</i> ) | D1          | 0.70 (0.32-1.56) | 0.385        |
|                                 | D3          | 0.11 (0.02-0.74) | <b>0.023</b> |
|                                 | D3/D1 ratio | 0.27 (0.07-1.00) | 0.051        |
| IL7R-003<br>( <i>Soluble</i> )  | D1          | 0.68 (0.29-1.59) | 0.370        |
|                                 | D3          | 0.20 (0.04-0.93) | <b>0.023</b> |
|                                 | D3/D1 ratio | 0.33 (0.09-1.28) | 0.109        |

IQR HR refers to a hazard ratio normalized to an increment from 1<sup>st</sup> to 3<sup>rd</sup> quartile to allow comparison between models. Values in bold indicate significance at  $p < 0.05$ .

CI: confidence interval.

**Supplemental Table 3** Area under ROC curve and performances for day 28 mortality after septic shock diagnosis in the discovery cohort

| <b>IL7R transcripts</b> | <b>Time-point</b> | <b>AUC (95% CI)</b> | <b>Threshold</b> | <b>Se (95% CI)</b> | <b>Sp (95% CI)</b> | <b>PPV (95% CI)</b> | <b>NPV (95% CI)</b> |
|-------------------------|-------------------|---------------------|------------------|--------------------|--------------------|---------------------|---------------------|
| IL7R-All                | D3                | 0.79 (0.63-0.96)    | 0.22             | 1 (1-1)            | 0.62 (0.38-0.81)   | 0.53 (0.41-0.69)    | 1 (1-1)             |
| IL7R-001                | D3                | 0.81 (0.65-0.97)    | 0.20             | 1 (1-1)            | 0.67 (0.48-0.86)   | 0.56 (0.45-0.75)    | 1 (1-1)             |
| IL7R-003                | D3                | 0.77 (0.61-0.94)    | 0.21             | 1 (1-1)            | 0.52 (0.33-0.71)   | 0.47 (0.39-0.6)     | 1 (1-1)             |

For each IL7R assay, a threshold was determined in the discovery cohort in order to maximize (i) the negative predictive value (NPV) and (ii) the specificity (Sp). Thresholds are expressed as calibrated normalized relative quantity (CNRQ) using HPRT1 as reference gene.

ROC: receiver operating characteristic, AUC: area under ROC curve; CI: confidence interval, Se: sensitivity, PPV: positive predictive value

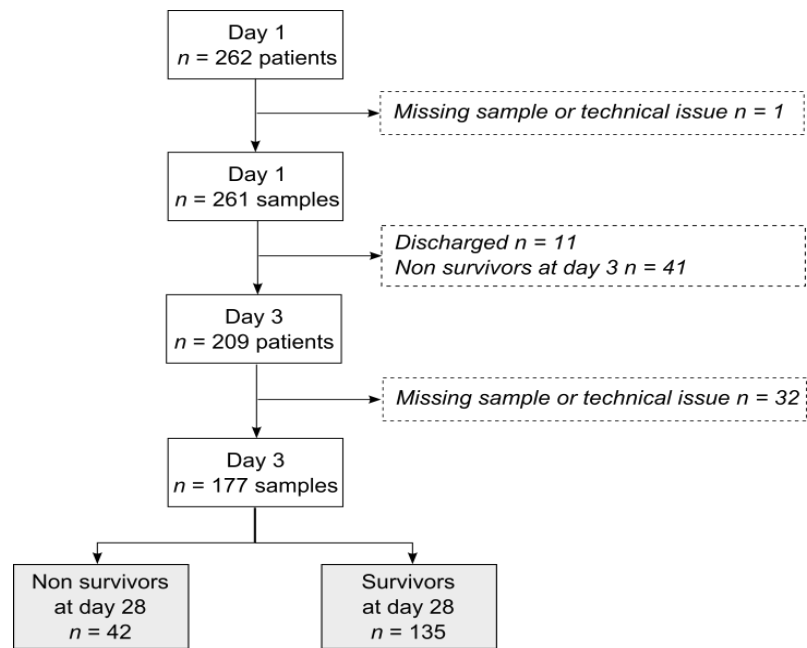

**Supplemental Figure 2** Validation cohort flowchart



**Supplemental Table 4** Biological parameters of patients from the validation cohort according to survival status at day 28 after septic shock diagnosis

| Parameters                                          | Overall cohort<br>(n=177) | Non-survivors<br>(n=42) | Survivors<br>(n=135) | p-value          |
|-----------------------------------------------------|---------------------------|-------------------------|----------------------|------------------|
| <b>Biological parameters at ICU admission</b>       |                           |                         |                      |                  |
| Lactate, mmol/L (n=174)                             | 2.45 [1.70-3.77]          | 3.15 [1.80-5.97]        | 2.30 [1.70-3.40]     | <b>0.016</b>     |
| Hemoglobin, g/dL                                    | 10.6 [9.30-11.9]          | 10.2 [9.33-11.3]        | 10.8 [9.20-12.2]     | 0.148            |
| Neutrophils, 10 <sup>9</sup> /L (n=140)             | 11.3 [6.87-17.4]          | 7.60 [5.84-11.2]        | 13.4 [7.83-20.2]     | <b>0.001</b>     |
| Lymphocytes, 10 <sup>9</sup> /L (n=140)             | 0.76 [0.40-1.16]          | 0.60 [0.38-0.85]        | 0.80 [0.40-1.20]     | 0.122            |
| Monocytes, 10 <sup>9</sup> /L (n=139)               | 0.43 [0.20-0.83]          | 0.34 [0.18-0.60]        | 0.56 [0.20-0.93]     | 0.079            |
| Platelets, 10 <sup>3</sup> /mm <sup>3</sup>         | 159 [92-233]              | 108 [80-187]            | 171 [113-242]        | <b>0.022</b>     |
| PaO <sub>2</sub> /FIO <sub>2</sub> (n=175)          | 166 [106-239]             | 172 [116-258]           | 162 [105-236]        | 0.549            |
| Creatinine, μmol/L                                  | 150 [93-235]              | 164 [102-229]           | 141 [81-238]         | 0.286            |
| Diuresis, mL/day                                    | 1250 [650-2250]           | 800 [263-1825]          | 1300 [750-2325]      | <b>0.017</b>     |
| <b>Biological parameters at D3</b>                  |                           |                         |                      |                  |
| Lactate, mmol/L (n=145)                             | 1.70 [1.30-2.20]          | 2.00 [1.65-3.22]        | 1.60 [1.20-2.00]     | <b>&lt;0.001</b> |
| Hemoglobin, g/dL (n =174)                           | 10.0 [9.00-11.0]          | 10.2 [9.10-11.0]        | 10.0 [9.00-10.9]     | 0.669            |
| Neutrophils, 10 <sup>9</sup> /L (n=139)             | 13.0 [8.13-17.7]          | 14.4 [9.49-17.4]        | 11.6 [7.91-17.7]     | 0.287            |
| Lymphocytes, 10 <sup>9</sup> /L (n=139)             | 0.80 [0.60-1.08]          | 0.64 [0.40-0.91]        | 0.84 [0.60-1.11]     | <b>0.005</b>     |
| Monocytes, 10 <sup>9</sup> /L (n=139)               | 0.61 [0.35-0.98]          | 0.55 [0.35-0.82]        | 0.66 [0.37-0.99]     | 0.551            |
| Platelets, 10 <sup>3</sup> /mm <sup>3</sup> (n=174) | 136 [74-213]              | 79 [47-167]             | 147 [81-230]         | <b>0.005</b>     |
| PaO <sub>2</sub> /FIO <sub>2</sub> (n=165)          | 227 [160-295]             | 222 [147-288]           | 230 [169-298]        | 0.568            |
| Creatinine, μmol/L (n=175)                          | 107 [66-193]              | 150 [106-200]           | 99 [62-186]          | <b>0.020</b>     |
| Diuresis, mL/day                                    | 1400 [850-2300]           | 1075 [200-1875]         | 1500 [900-2550]      | <b>0.008</b>     |

Parameters are expressed as median [interquartile range]. Comparisons between survivor and non-survivor patients at day 28 were performed with Mann-Whitney or t-tests. Values in bold indicate significance at  $p < 0.05$ .

## References

1. Landelle C, Lepape A, Français A, et al.: Nosocomial infection after septic shock among intensive care unit patients. *Infect Control Hosp Epidemiol* 2008; 29:1054–1065
2. Friggeri A, Cazalis M-A, Pachot A, et al.: Decreased CX3CR1 messenger RNA expression is an independent molecular biomarker of early and late mortality in critically ill patients. *Crit Care* 2016; 20:204
3. Le Gall JR, Lemeshow S, Saulnier F: A new Simplified Acute Physiology Score (SAPS II) based on a European/North American multicenter study. *JAMA J Am Med Assoc* 1993; 270:2957–2963
4. Vincent JL, Moreno R, Takala J, et al.: The SOFA (Sepsis-related Organ Failure Assessment) score to describe organ dysfunction/failure. On behalf of the Working Group on Sepsis-Related Problems of the European Society of Intensive Care Medicine. *Intensive Care Med* 1996; 22:707–710
5. Charlson ME, Pompei P, Ales KL, et al.: A new method of classifying prognostic comorbidity in longitudinal studies: development and validation. *J Chronic Dis* 1987; 40:373–383
6. Hellemans J, Mortier G, De Paepe A, et al.: qBase relative quantification framework and software for management and automated analysis of real-time quantitative PCR data. *Genome Biol* 2007; 8:R19
